# Supplementary material
Source: HighWire-hosted journal article supplement (https://bmjopen.bmj.com/content/8/1/e017717)
Supplement: inline-supplementary-material-1 [file inline-supplementary-material-1.pdf]

## Supplementary file 1 – Complete search strategy

### *Medline and Cinahl*

S28 S26 NOT S27  
S27 review  
S26 S24 AND S25  
S25 S13 NOT S15  
S24 S14 OR S16 OR S17 OR S21 OR S22 OR S23  
S23 (behaviour OR behavior) AND health  
S22 (MH "Health Behavior+") OR (MH "Risk Reduction Behavior+")  
S21 S18 OR S20  
S20 S19 AND S1  
S19 screen\* AND uptake OR attendance OR intention OR adherence  
S18 (MM "Early Detection of Cancer/UT")  
S17 anxiety\* OR worry\* OR denial\* OR hopelessness\* OR avoidance\*  
S16 efficacy OR effectiv\*  
S15 PT review OR PT letter OR PT comment OR PT editorial  
S14 percep\* OR perceive\* OR understand\* OR understood\* OR accura\* OR comprehen\*  
S13 S9 NOT S12  
S12 S10 OR S11  
S11 (MH "Prognosis+")  
S10 prognos\* OR treatment\* OR surgery\*  
S9 S1 AND S8  
S8 S6 OR S7  
S7 (MH "Risk Assessment+")  
S6 S4 AND S5  
S5 score\* OR model\* OR predict\* OR tool\*  
S4 S2 OR S3  
S3 (MH "Risk+")  
S2 risk\*  
S1 "cancer" OR (MH "Neoplasms+")

### *Embase*

1 cancer.mp. or exp neoplasm/  
2 exp risk/ or risk\*.mp.  
3 (score\* or model\* or predict\* or tool\*).mp. [mp=title, abstract, heading word, drug trade name, original title, device manufacturer, drug manufacturer, device trade name, keyword]  
4 2 and 3  
5 exp risk assessment/  
6 4 or 5  
7 1 and 6  
8 (percep\* or perceive\* or understand\* or understood\* or accura\* or comprehen\*).mp. [mp=title, abstract, heading word, drug trade name, original title, device manufacturer, drug manufacturer, device trade name, keyword]  
9 (efficacy\* or effectiv\*).mp. [mp=title, abstract, heading word, drug trade name, original title, device manufacturer, drug manufacturer, device trade name, keyword]  
10 exp prognosis/  
11 (prognos\* or treatment\* or surgery\*).mp. [mp=title, abstract, heading word, drug trade name, original title, device manufacturer, drug manufacturer, device trade name, keyword]

- 12 (review or letter or comment or editorial).pt.  
 13 (radiotherapy\* or stage\* or grade\*).mp. [mp=title, abstract, heading word, drug trade name, original title, device manufacturer, drug manufacturer, device trade name, keyword]  
 14 (anxiety\* or worry\* or fatalism\* or hopelessness\* or denial\* or avoid\*).mp. [mp=title, abstract, heading word, drug trade name, original title, device manufacturer, drug manufacturer, device trade name, keyword]  
 15 8 or 9 or 14  
 16 10 or 11 or 12 or 13  
 17 exp cancer screening/  
 18 health behaviour.mp. or exp health behavior/  
 19 ((behaviour or behavior) and health).mp. [mp=title, abstract, heading word, drug trade name, original title, device manufacturer, drug manufacturer, device trade name, keyword]  
 20 (screen\* and (uptake or attendance or intention or adherence)).mp. [mp=title, abstract, heading word, drug trade name, original title, device manufacturer, drug manufacturer, device trade name, keyword]  
 21 20 and 1  
 22 15 or 17 or 18 or 19 or 21  
 23 22 and 7  
 24 23 not 16  
 25 limit 24 to yr="2000 -Current"  
 26 25 not review.mp. [mp=title, abstract, heading word, drug trade name, original title, device manufacturer, drug manufacturer, device trade name, keyword]

### ***PsycInfo***

- S20 S19 NOT review Limiters - Publication Year: 2000-2015  
 S19 S17 NOT (S10 OR S11 OR S12)  
 S18 S17 NOT (S10 OR S11 OR S12)  
 S17 S7 and (S8 or S9 or S13 or S15 or S16)  
 S16 health AND (behaviour OR behavior)  
 S15 S14 AND S1  
 S14 screen\* AND (uptake OR attendance OR intention OR adherence)  
 S13 MM "Cancer Screening"  
 S12 (prognos\* OR treatment\* OR surgery\*) AND (S10 OR S11)  
 S11 prognos\* OR treatment\* OR surgery\*  
 S10 DE "Prognosis"  
 S9 efficacy or effectiv\* or worry\* or anxiety\* or hopelessness\* or denial\*  
 S8 percep\* OR perceive\* OR understand\* OR understood\* OR accura\* OR comprehen\*  
 S7 (S1 AND S6)  
 S6 (S4 OR S5)  
 S5 DE "Risk Assessment"  
 S4 (S2 AND S3)  
 S3 score\* OR model\* OR predict\* OR tool\*  
 S2 risk\*  
 S1 DE "Neoplasms" OR DE "Benign Neoplasms" OR DE "Breast Neoplasms" OR DE "Endocrine Neoplasms" OR DE "Leukemias" OR DE "Nervous System Neoplasms" OR DE "Terminal Cancer"
