# Supplementary material
Source: HighWire-hosted journal article supplement (https://bmjopen.bmj.com/content/8/1/e017717)
Supplement: inline-supplementary-material-2 [file inline-supplementary-material-2.pdf]

---

|                  |   |   |   |   |   |   |   |     |   |
|------------------|---|---|---|---|---|---|---|-----|---|
| Sequist<br>2011  | ● | ● | ● | ● | ● | ● | ● | n/a | M |
| Sherratt<br>2016 | ● | ● | ● | ● | ● | ● | ● | ●   | H |
| Trevena<br>2008  | ● | ● | ● | ● | ● | ● | ● | ●   | M |

---

● Low (L) ● Medium (M) ● High (H)
